# Supplementary material for: Childhood cancer incidence and survival trends in Estonia (1970–2016): a nationwide population-based study
Source: Springer Nature journal article supplement (doi:10.1186/s12885-019-6510-7), 2020-01-10
Supplement: MOESM1 [file 17661106]

**Supplementary Table 1.** Annual percentage change in incidence by age groups and ICC3 site-groups (malignant only), Estonia 1970–2016

|                                                                                           | 0–4 years   |                 | 5–9 years        |           | 10–14 years |                |
|-------------------------------------------------------------------------------------------|-------------|-----------------|------------------|-----------|-------------|----------------|
|                                                                                           | APC (%)     | 95% CI          | APC (%)          | 95% CI    | APC (%)     | 95% CI         |
| <b>All sites</b>                                                                          | 0.7         | -0.2–1.5        | 0.1              | -0.5–0.7  | <b>0.6</b>  | <b>0.1–1.2</b> |
| <b>I Leukemias, myeloproliferative diseases, and myelodysplastic diseases</b>             | 0.0         | -0.9–1.0        | 0.4              | -0.5–1.2  | 0.6         | -1.2–2.5       |
| <b>II. Lymphomas and reticuloendothelial neoplasms</b>                                    | 1.0         | -0.7–2.7        | -1.6             | -3.5–0.3  | 0.7         | -0.9–2.3       |
| <b>III. CNS and miscellaneous intracranial and intraspinal neoplasms (malignant only)</b> | 1.5         | -0.6–3.6        | 7.6 <sup>a</sup> | -2.3–18.6 | 0.2         | -1.6–2.0       |
| <b>IV. Neuroblastoma and other peripheral nervous cell tumors</b>                         | <b>3.1</b>  | <b>1.3–5.0</b>  | -1.6             | -4.4–1.2  | -0.8        | -11.7–11.5     |
| <b>V. Retinoblastoma</b>                                                                  | 0.9         | -2.6–4.5        | NC               |           | NC          |                |
| <b>VI. Renal tumors</b>                                                                   | -1.1        | -3.3–1.2        | 0.8              | -4.4–6.2  | NC          |                |
| <b>VII. Hepatic tumors</b>                                                                | 2.4         | -1.3–6.2        | NC               |           | NC          |                |
| <b>VIII. Malignant bone tumors</b>                                                        | NC          |                 | 1.7              | -4.2–8.0  | -1.3        | -4.1–1.6       |
| <b>IX. Soft tissue and other extraosseous sarcomas</b>                                    | 1.6         | -0.5–3.7        | 1.2              | -3.5–6.1  | 1.0         | -2.8–5.0       |
| <b>X. Germ cell tumors, trophoblastic tumors, and neoplasms of gonads</b>                 | <b>2.7</b>  | <b>0.4–5.1</b>  | NC               |           | 1.2         | -2.4–5.0       |
| <b>XI. Other malignant epithelial neoplasms and malignant melanomas</b>                   | NC          |                 | NC               |           | 2.0         | -0.4–4.4       |
| <b>XII. Other and unspecified malignant neoplasms</b>                                     | <b>-3.4</b> | <b>-5.9;0.8</b> | NC               |           | NC          |                |

<sup>a</sup>joinpoint in 1985

NC not calculated, for sites with less than 10 cases over the study period

Statistically significant findings marked in bold
